1 **Gradual centriole maturation associates with the mitotic surveillance pathway**  
2 **in mouse development**

3  
4

5 Cally Xiao<sup>1,2,3,4,6</sup>, Marta Grzonka<sup>1,2,4</sup>, Charlotte Gerards<sup>1,2,4</sup>, Miriam Mack<sup>1,2,5</sup>, Rebecca Figge<sup>4</sup>,  
6 Hisham Bazzi<sup>1,2,\*</sup>

7

8 <sup>1</sup>Department of Dermatology and Venereology, University Hospital of Cologne, 50931  
9 Cologne, Germany

10 <sup>2</sup>The Cologne Cluster of Excellence in Cellular Stress Responses in Aging-associated  
11 Diseases (CECAD), University of Cologne, 50931 Cologne, Germany

12 <sup>3</sup>Graduate Program in Pharmacology and Experimental Therapeutics, University Hospital of  
13 Cologne, 50931 Cologne, Germany

14 <sup>4</sup>Graduate School for Biological Sciences, University of Cologne, 50674 Cologne, Germany

15 <sup>5</sup>Masters Program in Biological Sciences, University of Cologne, 50674 Cologne, Germany

16 <sup>6</sup>Present address: Laboratory of Neuro Imaging, USC Stevens Neuroimaging and Informatics  
17 Institute, Keck School of Medicine of University of Southern California, Los Angeles, CA 90033,  
18 USA

19

20 \*Correspondence: [hisham.bazzi@uk-koeln.de](mailto:hisham.bazzi@uk-koeln.de) (H.B.)

21

22 Running title: Centriole surveillance in embryos

23

24 Keywords: centrosomes/development/embryonic stem cells/p53/SAS-4

25

26 **Abstract**

27

28 Centrosomes, composed of two centrioles and pericentriolar material, organize mitotic  
29 spindles during cell division and template cilia during interphase. The first few divisions during  
30 mouse development occur without centrioles, which form around embryonic day (E) 3.  
31 However, disruption of centriole biogenesis in *Sas-4* null mice leads to embryonic arrest around  
32 E9. Centriole loss in *Sas-4*<sup>-/-</sup> embryos causes prolonged mitosis and p53-dependent cell death.  
33 Studies *in vitro* discovered a similar USP28-, 53BP1-, and p53-dependent mitotic surveillance  
34 pathway that leads to cell cycle arrest. In this study, we show that an analogous pathway is  
35 conserved *in vivo* where 53BP1 and USP28 are upstream of p53 in *Sas-4*<sup>-/-</sup> embryos. The  
36 data indicates that the pathway is established around E7 of development, four days after the  
37 centrioles appear. Our data suggest that the newly formed centrioles gradually mature to  
38 participate in mitosis and cilia formation around the beginning of gastrulation, coinciding with  
39 the activation of mitotic surveillance pathway upon centriole loss.

## 40 Introduction

41

42 Centrosomes are major microtubule organizing centers (MTOCs) of animal cells and are  
43 composed of two centrioles, one mature mother centriole with distal and sub-distal  
44 appendages and one daughter centriole, surrounded by a proteinaceous pericentriolar  
45 material (PCM) (Conduit *et al*, 2015). During mitosis, centrosomes help assemble the mitotic  
46 spindle, and during interphase, the mother centriole forms the basal body template for cilia  
47 (Bornens, 2012). In proliferating cells, centrioles can form *de novo* without pre-existing  
48 centrioles or use the scaffold of existing centrioles to duplicate once per cell cycle in late G1  
49 and S phases (Loncarek & Khodjakov, 2009). The centriole formation pathway has been  
50 defined in cell culture and in different organisms and relies on a set of core proteins that  
51 include spindle assembly defective protein 4 (SAS-4, also called CENPJ or CPAP) (Kirkham  
52 *et al*, 2003; Kleylein-Sohn *et al*, 2007; Leidel & Gonczy, 2003; Tang *et al*, 2009). The newly  
53 formed centrioles undergo maturation over two cell cycles to acquire appendages, become  
54 MTOCs and template cilia (Kong *et al*, 2014). Cilia formation relies on docking of the mother  
55 centriole to the plasma membrane through distal appendage proteins, such as CEP164  
56 (Graser *et al*, 2007; Siller *et al*, 2017), and on intra-flagellar transport proteins, such as IFT88  
57 (Haycraft *et al*, 2007).

58

59 During rodent development, and unlike the development of most organisms, the first cell  
60 divisions post-fertilization occur without centrioles (Courtois *et al*, 2012; Gueth-Hallonet *et al*,  
61 1993; Howe & FitzHarris, 2013; Manandhar *et al*, 1998; Woolley & Fawcett, 1973). In the  
62 mouse embryo, centrioles first form by *de novo* biogenesis starting at the blastocyst stage  
63 around embryonic day (E) 3.5 (Courtois & Hiiragi, 2012). Before centriole formation, diffuse  $\gamma$ -  
64 tubulin signals, a PCM component and microtubule nucleator, appear at the morula stage  
65 around E3, and  $\gamma$ -tubulin signals become more focused as centrioles form; however, the newly  
66 formed centrioles do not seem to act as MTOCs in interphase cells (Howe & FitzHarris, 2013).  
67 In addition, the first cilia form almost two days post-implantation around E6.5 in cells of the  
68 epiblast (Bangs *et al*, 2015).

69

70 Mouse embryonic stem cells (mESCs) are a well-established *in vitro* model of embryo  
71 development that are derived from the pluripotent inner cell mass of blastocysts at E3.5 but  
72 molecularly resemble epiblast cells post-implantation (Nichols & Smith, 2011). To maintain  
73 uniform pluripotency, mESCs are cultured with leukemia inhibitory factor (LIF) and two other  
74 differentiation inhibitors abbreviated as 2i (Williams *et al*, 1988; Ying *et al*, 2008). In  
75 pluripotency, the transcription factor NANOG is highly expressed in mESCs and regulates self-

76 renewal (Rosner *et al*, 1990). In this study, we used mESCs to complement our *in vivo*  
77 experiments by studying the growth dynamics of cells without centrioles.

78

79 We have previously shown that the genetic removal of SAS-4 in the mouse resulted in the  
80 loss of centrioles and cilia (Bazzi & Anderson, 2014a). The *Sas-4<sup>-/-</sup>* embryos arrested  
81 development around E9.5 due to p53-dependent cell death. The increase in p53 in *Sas-4<sup>-/-</sup>*  
82 embryos was not due the secondary loss of cilia, DNA damage or chromosome segregation  
83 errors. Also, these phenotypes are not specific to *Sas-4<sup>-/-</sup>* embryos because mutations in  
84 different genes, such as *Cep152*, that cause centriole loss show similar phenotypes (Bazzi &  
85 Anderson, 2014a, b). Notably, the fraction of mitotic cells was higher in *Sas-4<sup>-/-</sup>* embryos at  
86 E7.5 and E8.5, indicating a longer mitotic duration of cells without centrioles, which was also  
87 confirmed by time-lapse imaging of dividing cells. Because a short nocodazole treatment to  
88 prolong mitosis upregulated p53 in cultured wild-type (WT) embryos, the data suggested that  
89 the less efficient mitosis without centrioles activated a novel p53-dependent pathway (Bazzi  
90 & Anderson, 2014a). In cultured mammalian cell lines *in vitro*, a similar pathway that is  
91 activated by the loss of centrioles or prolonging mitosis leads to p53-dependent cell cycle  
92 arrest and is called the mitotic surveillance pathway (Lambrus & Holland, 2017; Lambrus *et*  
93 *al*, 2015; Wong *et al*, 2015). Recently, p53-binding protein 1 (53BP1) and ubiquitin specific  
94 peptidase 28 (USP28) have been shown to be essential for the conduction of this pathway *in*  
95 *vitro* (Fong *et al*, 2016; Lambrus *et al*, 2016; Meitinger *et al*, 2016). These studies showed that  
96 mutations in *53BP1* or *USP28* rescued the growth arrest phenotype observed in cells without  
97 centrioles. However, whether a similar 53BP1- and USP28-dependent pathway operates *in*  
98 *vivo* and can cause the p53-dependent cell death phenotype in the mouse are still not known.

99

100 In this study, our data showed that the mitotic surveillance pathway is conserved in mice *in*  
101 *vivo* and that 53BP1 and USP28 are essential for its conduction upstream of p53. In order to  
102 explain the late onset of the phenotype upon the loss of centrioles, we also asked when during  
103 development this pathway is established. The data indicated that the newly formed centrioles  
104 around E3 are not fully mature and do not seem to be required for mitosis until around E7 of  
105 development, when the pathway is initiated. Our data suggest that once the cells start to  
106 depend on centrosomes as MTOCs in mitosis and ciliogenesis, then they sense the loss of  
107 centrioles and activate the p53-dependent mitotic surveillance pathway.

## 108 **Results and Discussion**

109

### 110 **Mutations in *53bp1* or *Usp28* rescue the *Sas-4* mutant phenotype *in vivo***

111 To test the conservation of the mitotic surveillance pathway and the involvement of 53BP1 and  
112 USP28 in its activation *in vivo*, *53bp1*<sup>+/-</sup> and *Usp28*<sup>+/-</sup> null mouse alleles were generated using  
113 CRISPR/Cas9 gene editing (see Methods and Fig. EV1) and crossed to *Sas-4*<sup>+/-</sup> mice (Bazzi  
114 & Anderson, 2014a). Both *Sas-4*<sup>-/-</sup> *53bp1*<sup>-/-</sup> and *Sas-4*<sup>-/-</sup> *Usp28*<sup>-/-</sup> embryos showed  
115 remarkable rescues of the morphology and size compared to the *Sas-4*<sup>-/-</sup> embryos at E9.5  
116 (Fig. 1A). *Sas-4*<sup>-/-</sup> *53bp1*<sup>-/-</sup> and *Sas-4*<sup>-/-</sup> *Usp28*<sup>-/-</sup> embryos both underwent body turning, had  
117 visible somites and open heads, and were similar to *Sas-4*<sup>-/-</sup> *p53*<sup>-/-</sup> mutants (Bazzi & Anderson,  
118 2014a). At the molecular level, *Sas-4*<sup>-/-</sup> *53bp1*<sup>-/-</sup> and *Sas-4*<sup>-/-</sup> *Usp28*<sup>-/-</sup> embryos showed highly  
119 reduced levels of p53 and cleaved-Caspase 3 (Cl-CASP3) compared to *Sas-4*<sup>-/-</sup> embryos (Fig.  
120 1B, C). The data indicated that mutating *53bp1* or *Usp28* suppressed both p53 stabilization  
121 and p53-dependent cell death upon centriole loss *in vivo* and established the conservation of  
122 the mitotic surveillance pathway in the mouse.

123

### 124 **The mitotic surveillance pathway is activated around E7**

125 In order to determine when the mitotic surveillance pathway is activated in *Sas-4*<sup>-/-</sup> embryos,  
126 we used immunostaining and quantified nuclear p53 levels during development. At E7.5,  
127 *Sas-4*<sup>-/-</sup> embryos were smaller than control embryos (WT or *Sas-4*<sup>+/-</sup>) with around 1.5-fold  
128 higher nuclear p53 in the epiblast (Fig. 2A, B) (Bazzi & Anderson, 2014a). Earlier in  
129 development at E6.5, *Sas-4*<sup>-/-</sup> embryos were morphologically indistinguishable from control  
130 embryos, and nuclear p53 was not detectably different (Fig. 2A, B). *Ift88* null (cilia mutant)  
131 embryos were used as controls for *Sas-4*<sup>-/-</sup> centriole mutant embryos, and were similar to WT  
132 embryos both morphologically and in terms of p53 nuclear levels at E7.5 and E6.5 (Fig. EV2),  
133 confirming our earlier finding that p53 upregulation was due to centriole loss and not the  
134 secondary loss of cilia (Bazzi & Anderson, 2014a). The data suggested that the increased level  
135 of nuclear p53 in *Sas-4*<sup>-/-</sup> embryos starts around E7 of development and is independent of cilia  
136 loss *per se*.

137

### 138 **USP28 and 53BP1 are expressed in the epiblast before E6**

139 We next asked whether the upregulation of p53 in *Sas-4*<sup>-/-</sup> embryos around E7, and not before,  
140 coincided with the onset of expression of either 53BP1 or USP28, the upstream regulators of  
141 p53. We performed immunostaining of 53BP1 and USP28 in control and *Sas-4*<sup>-/-</sup> embryos at  
142 E5.5 and E6.5. Both 53BP1 and USP28 were expressed in WT embryos at E5.5 (Fig. 2C) and  
143 E6.5 (Fig. 2D). Of note, USP28 expression was clearly detectable in the embryonic epiblast  
144 but not in the surrounding visceral endoderm. *Sas-4*<sup>-/-</sup> embryos also expressed both 53BP1

145 and USP28 at E6.5 (Fig. EV2C). The data indicated that the regulation of the onset of 53BP1  
146 or USP28 expression does not seem to be responsible for p53 upregulation and activation of  
147 the mitotic surveillance pathway in *Sas-4<sup>-/-</sup>* embryos, suggesting that other mechanisms  
148 establish the pathway around E7.

149

### 150 **The proper growth of *Sas-4<sup>-/-</sup>* mESCs is dependent on p53**

151 To study the dynamics of the mitotic surveillance pathway activation, we derived primary  
152 mESCs from WT and *Sas-4<sup>-/-</sup>* blastocysts at E3.5. *Sas-4<sup>-/-</sup>* primary mESCs were successfully  
153 derived and propagated *in vitro* and lacked detectable centrosomes in interphase cells, as  
154 judged by  $\gamma$ -tubulin (TUBG) staining, compared to WT cells, which had centrosomes in every  
155 cell (Fig. 3A). TUBG aggregates were seen only at the poles of mitotic cells in *Sas-4<sup>-/-</sup>* mESCs,  
156 consistent with our findings in *Sas-4<sup>-/-</sup>* embryos where these PCM aggregates lacked  
157 centrioles (Bazzi & Anderson, 2014a). Both WT and *Sas-4<sup>-/-</sup>* primary mESCs showed high  
158 levels of nuclear NANOG in media containing LIF and 2i, indicating their pluripotent potential  
159 (Fig. 3B). In pluripotent conditions (LIF and 2i), WT and *Sas-4<sup>-/-</sup>* primary mESCs had  
160 seemingly similar levels of p53, as judged by immunofluorescence (Fig. 3B). Because *Sas-*  
161 *4<sup>-/-</sup>* embryos upregulated p53 starting after E6.5 (Fig. 2), we reasoned that *Sas-4<sup>-/-</sup>* mESC  
162 partial differentiation may trigger a similar response *in vitro*. Thus, we removed the  
163 pluripotency factors (LIF and 2i) for three days, and the pluripotency potential declined as  
164 shown by the decrease in NANOG nuclear signal in both WT and *Sas-4<sup>-/-</sup>* mESCs (Fig. 3B).  
165 The partially differentiated mESCs are not likely to represent a specific lineage because  
166 mESCs first move into a transitional state as they exit self-renewal (Martello & Smith, 2014).  
167 Importantly, upon partial differentiation, nuclear p53 levels decreased in WT but not in *Sas-*  
168 *4<sup>-/-</sup>* mESCs (Fig. 3B). Quantification of the normalized nuclear p53 levels revealed that they  
169 were slightly, but significantly, higher in *Sas-4<sup>-/-</sup>* mESCs compared to WT mESCs in  
170 pluripotent conditions, and this difference appeared more pronounced upon partial  
171 differentiation (Fig. 3C). Also, the decrease in p53 in WT mESCs upon partial differentiation  
172 was also significant (Fig. 3C).

173

174 Although *Sas-4<sup>-/-</sup>* mESCs could be derived and propagated in pluripotent condition cultures,  
175 we noticed that they grew slower than WT mESCs (Fig. 3D). The growth defect became more  
176 obvious upon partial differentiation (Fig. 3D). To check whether the slower growth in *Sas-4<sup>-/-</sup>*  
177 mESCs was dependent on p53 and the possible activation of the mitotic surveillance pathway,  
178 we generated *Sas-4<sup>-/-</sup> p53<sup>-/-</sup>* and *p53<sup>-/-</sup>* control mESCs using CRISPR/Cas9 (see Methods  
179 and Fig. EV3). The data showed that *Sas-4<sup>-/-</sup> p53<sup>-/-</sup>* completely rescued the growth delay  
180 phenotype relative to *p53<sup>-/-</sup>* and WT mESCs under pluripotent and partially differentiated  
181 conditions (Fig. 3D).

182

183 **Mitotic surveillance pathway activation is associated with prolonged mitosis *in vivo* and**  
184 ***in vitro***

185 We have previously shown that prometaphase was prolonged in *Sas-4<sup>-/-</sup>* embryos at E7.5 and  
186 at E8.5 (Bazzi & Anderson, 2014a). To address whether the activation of the mitotic  
187 surveillance pathway around E7 coincided with the onset of prolonged mitosis in *Sas-4<sup>-/-</sup>*  
188 embryos, we performed immunostaining for the mitotic marker phospho-histone H3 (pHH3) at  
189 E6.5. We calculated the mitotic index, the percentage of pHH3-positive cells in the epiblast, as  
190 an indirect measure of mitotic duration and detected no difference between control and *Sas-*  
191 *4<sup>-/-</sup>* embryos at E6.5 (Fig. 4A). In contrast, our previous data showed that the mitotic index of  
192 *Sas-4<sup>-/-</sup>* embryos at E7.5 was significantly higher than that of control embryos (Fig. 4A) (Bazzi  
193 & Anderson, 2014a). The data indicated that the mitotic surveillance pathway activation  
194 through p53 upregulation temporally correlates with prolonged mitosis *in vivo*.

195

196 In line with the embryo data *in vivo*, the mitotic indices of WT and *Sas-4<sup>-/-</sup>* mESCs *in vitro* were  
197 similar in pluripotency. However, upon partial differentiation, the mitotic index of *Sas-4<sup>-/-</sup>*  
198 mESCs was significantly higher than that of WT mESCs (Fig. 4B). These findings indicated  
199 that the enhanced activation of the mitotic surveillance pathway in mESCs also correlates with  
200 prolonged mitosis upon partial differentiation, and that the growth dynamics of *Sas-4<sup>-/-</sup>* mESCs  
201 largely resemble those of *Sas-4<sup>-/-</sup>* embryos.

202

203 **Gradual centriole maturation correlates with the establishment of the mitotic**  
204 **surveillance pathway *in vivo***

205 We next hypothesized that the centrioles that are first formed by *de novo* biogenesis around  
206 E3 were not fully mature yet and that their maturation correlates with the delayed response to  
207 centriole loss in *Sas-4<sup>-/-</sup>* embryos around E7. Therefore, we performed immunostaining for  
208 TUBG and the distal appendage protein CEP164, as a marker of the more mature mother  
209 centrioles, on developing embryos between E3.5 and E6.5. Starting at E3.5, almost all the cells  
210 contained centrosomes marked by TUBG foci (Fig. 4C, D). Intriguingly, CEP164 did not  
211 localize to these centrosomes at E3.5, supporting our hypothesis that the centrioles were not  
212 mature (Fig. 4C, D). At E5.5, around 65% of the centrosomes in the epiblast colocalized with  
213 CEP164, and the percentage increased to 85% at E6.5 (Fig. 4C, D). We concluded that the  
214 newly formed centrioles in mouse embryos gradually mature to participate in mitosis and cilia  
215 formation overlapping with the activation of the mitotic surveillance pathway in *Sas-4<sup>-/-</sup>*  
216 centriole mutant embryos around E7 (Fig. 5).

217

218 Although mitosis is usually the shortest phase of the cell cycle and lasts only around half an  
219 hour, it is an essential phase where the segregation of DNA and other cellular components  
220 must be precisely accomplished. In addition to the well-studied spindle assembly checkpoint  
221 (SAC), mammalian cells have developed a newly discovered pathway to monitor mitosis  
222 termed the mitotic surveillance pathway that is independent of the SAC (Lambrus & Holland,  
223 2017). This pathway seems to be limited to mammalian systems because organisms such as  
224 *Drosophila melanogaster* lack 53BP1 and USP28 homologs (Lambrus & Holland, 2017), and  
225 zygotic *Sas-4* mutant flies survive until adulthood (Basto *et al*, 2006).

226

227 Both control and *Sas-4*<sup>-/-</sup> embryos show relatively high nuclear p53 around E6.5, which has  
228 been reported in WT embryos at E5.5 and E6.5 (Bowling *et al*, 2018). It has been suggested  
229 that p53 may be involved in cellular competition during this stage of development to eliminate  
230 less fit cells before the germline is selected (Zhang *et al*, 2017). Higher p53 levels in *Sas-4*<sup>-/-</sup>  
231 embryos around E7 coincide with the window of the initiation of gastrulation as well as the  
232 appearance of cilia on epiblast-derived lineages (Bangs *et al.*, 2015). Our data largely exclude  
233 the lack of cilia *per se* (Fig. EV2) or the expression of the mitotic surveillance pathway  
234 components (Fig. 2C, D) as determinants of pathway activation after a lag period and at a  
235 specific developmental window. In line with this, 53BP1 expression has been reported  
236 throughout mouse pre-implantation development (Ziegler-Birling *et al*, 2009). In addition,  
237 USP28 expression was restricted to the epiblast, which may explain why the fast proliferating  
238 epiblast cells seem to be more affected by centriole loss compared to the visceral endoderm  
239 (Bazzi & Anderson, 2014a). Collectively, our data support a model whereby the newly formed  
240 centrioles around E3 gradually mature during development until around E7, when they are  
241 competent to participate in cilia formation as well as act as efficient MTOCs during mitosis  
242 (Fig. 5). As such, *Sas-4*<sup>-/-</sup> centriole mutant embryos may not activate the p53-dependent  
243 mitotic surveillance pathway until centrioles are more mature and required for mitosis. This  
244 gradual transition is reminiscent of the earlier transition from meiotic- to mitotic-like divisions  
245 during pre-implantation and may be a general phenomenon in development including, for  
246 example, cilia formation, elongation and function (Bangs *et al.*, 2015; Courtois & Hiiragi, 2012).



247 **Materials and Methods**

248

249 **Animals and genotyping**

250 The *Sas-4*<sup>-/-</sup> mice (*Cenpj*<sup>tm1d(EUCOMM)Wtsi/tm1d(EUCOMM)Wtsi</sup>) (Bazzi & Anderson, 2014a) and the  
 251 *Ift88*<sup>-/-</sup> null mouse allele generated from the *Ift88*<sup>fl/fl</sup> allele (*Ift88*<sup>tm1Bky</sup>) (Haycraft *et al.*, 2007)  
 252 were used in this study. The CRISPR/Cas9 endonuclease-mediated knockouts of *53bp1*<sup>-/-</sup>  
 253 and *Usp28*<sup>-/-</sup> were generated by the CECAD *in vivo* Research Facility using microinjection or  
 254 electroporation of the corresponding gRNA, Cas9 mRNA and Cas9 protein into fertilized  
 255 zygotes (Table 1) (Chu *et al.*, 2016; Troder *et al.*, 2018). The gRNA target sequence predictor  
 256 tool developed by the Broad Institute was used to design gRNAs (Doench *et al.*, 2016).

257

258 The animals were housed and bred under standard conditions in the CECAD animal facility,  
 259 and the allele generation (84-02.04.2014.A372) and experiments (84-02.05.50.15.039) were  
 260 approved by the Landesamt für Natur, Umwelt, und Verbraucherschutz Nordrhein-Westfalen  
 261 (LANUV-NRW) in Germany. All the phenotypes were analyzed in the FVB/NRj background.  
 262 Genotyping was carried out using standard and published PCR protocols. The PCR products  
 263 for *53bp1*- and *Usp28*-mutant mice were digested with *KpnI* and *ApoI* restriction enzymes (New  
 264 England BioLabs; Ipswich, MA, USA), respectively, to distinguish the WT and mutant alleles.

265

266 **Table 1.** Information for CRISPR/Cas9 and genotyping of *53bp1* and *Usp28* mouse alleles.

|                 | <b><i>53bp1</i></b>                                          | <b><i>Usp28</i></b>   |
|-----------------|--------------------------------------------------------------|-----------------------|
| <b>Exon</b>     | 4                                                            | 2                     |
| <b>gRNA</b>     | TCTTCTCATTTGGGTACCAG                                         | AATCAGCTGCGAGAAATCAC  |
| <b>Mutation</b> | 5 bp deletion and 4 bp insertion<br>(a net of 1 bp deletion) | 1 bp insertion        |
| <b>InDel</b>    | TCTTCTCATTTGTTCT-CAG                                         | AATCAGCTGCGAGAAATTCAC |
| <b>Primer 1</b> | GTGTTTAAGGTCCTGTGGGG                                         | TGATGCTCTGCTCCGAGAAA  |
| <b>Primer 2</b> | AGCTTTAATGTCCCTGCCCA                                         | AAGCCCACTGTACATTCCCA  |

267

268 **Mouse embryonic stem cell culture**

269 Primary mESCs were derived from E3.5 blastocysts as previously described (Bryja *et al.*, 2006),  
 270 cultured on feeder cells that were proliferation-inactivated with mitomycin C (Sigma Aldrich; St.  
 271 Louis, MO, USA) and 0.1% gelatin-coated plates (Sigma Aldrich). They were maintained in  
 272 media containing Knock-Out DMEM (Thermo Fisher Scientific; Waltham, MA, USA),  
 273 supplemented with 15% Hyclone fetal bovine serum (FBS; VWR; Radnor, PA, USA), 2 mM L-  
 274 glutamine (Biochrom; Berlin, Germany), 1% penicillin/streptomycin (Biochrom), 0.1 mM MEM

275 non-essential amino acids (Thermo Fisher Scientific), 1 mM sodium pyruvate (Thermo Fisher  
 276 Scientific), 0.1 mM  $\beta$ -mercaptoethanol (Thermo Fisher Scientific), 1000 U/ml leukemia  
 277 inhibitory factor (LIF; Merck; Darmstadt, Germany), and with 1  $\mu$ M PD0325901 (Miltenyi Biotec;  
 278 Bergisch Gladbach, Germany) and 3  $\mu$ M CHIR99021 (Miltenyi Biotec), together abbreviated  
 279 as 2i. Primary mESCs were gradually weaned off feeder cells and maintained in feeder-free  
 280 conditions. To induce partial differentiation, feeder-free primary mESCs were split and cultured  
 281 in media without LIF and 2i for three days.

282

### 283 **Generating CRISPR-modified primary mESCs**

284 The gRNA sequence for targeting *p53* was cloned as double-stranded DNA oligonucleotides  
 285 into the *BbsI* restriction site of the pX330-U6-Chimeric\_BB-CBh-hSpCas9 vector (Addgene;  
 286 Watertown, MA, USA) modified with a Puro-T2K-GFP cassette containing puromycin-  
 287 resistance and eGFP expression by Dr. Leo Kurian's research group (Center for Molecular  
 288 Medicine Cologne).

289

290 *p53*<sup>-/-</sup> and *Sas-4*<sup>-/-</sup> *p53*<sup>-/-</sup> mESCs (Table 2) were generated by lipofection of the modified  
 291 pX330 vector containing the gRNA target sequences using Lipofectamine 3000 (Thermo  
 292 Fisher Scientific). One day after transfection, 2  $\mu$ g/ml puromycin (Sigma Aldrich) was added to  
 293 the medium for two days, and the cells were allowed to recover in regular medium up to one  
 294 week after transfection. Single colonies were picked under a dissecting microscope and were  
 295 expanded. *p53* null cell lines were confirmed with sequencing (primers in Table 2),  
 296 immunofluorescence, and western blotting.

297

298 **Table 2.** Information for CRISPR/Cas9-generated *p53* alleles in mESCs.

|                  | <b><i>p53</i></b>         |                          |                                                       |                          |
|------------------|---------------------------|--------------------------|-------------------------------------------------------|--------------------------|
| <b>Exon</b>      | 4                         |                          |                                                       |                          |
| <b>gRNA</b>      | AGGAGCTCCTGACACTCGGA      |                          |                                                       |                          |
| <b>Cell line</b> | <i>p53</i> <sup>-/-</sup> |                          | <i>Sas-4</i> <sup>-/-</sup> <i>p53</i> <sup>-/-</sup> |                          |
| <b>Mutation</b>  | 16 bp deletion            | 1 bp deletion            | 2 bp deletion                                         | 1 bp deletion            |
| <b>InDel</b>     | TCC-----<br>-----T        | T-CGAGTGTC<br>AGGAGCTCCT | T--GAGTGTC<br>AGGAGCTCCT                              | TCC-AGTGTC<br>AGGAGCTCCT |
| <b>Primer 1</b>  | TTGTTTTCCAGACTTCTCCA      |                          |                                                       |                          |
| <b>Primer 2</b>  | CTGAAGAGGAACCCCAAAT       |                          |                                                       |                          |

299

### 300 **Growth assay**

301 To determine the growth kinetics of mESCs over three days, WT, *Sas-4*<sup>-/-</sup>, *p53*<sup>-/-</sup>, and *Sas-4*<sup>-/-</sup>  
 302 *p53*<sup>-/-</sup> mESCs were seeded at 10<sup>5</sup> cells per well of a 6-well plate in media with or without LIF

303 and 2i in triplicate. One set was counted every day for three days using a hemocytometer. Two  
304 pairs of each genotype from separate derivations were counted twice and constituted four  
305 biological replicates.

306

### 307 **Embryo dissection, immunofluorescence and imaging**

308 Pregnant female mice (E3.5 and E9.5) were sacrificed by cervical dislocation for embryo  
309 dissections under a dissecting microscope (M165C or M80, Leica Microsystems; Wetzlar,  
310 Germany) as previously described (Behringer *et al*, 2014; Bryja *et al.*, 2006). The embryos  
311 were fixed in 4% paraformaldehyde (PFA; Carl Roth; Karlsruhe, Germany) for 2 h at room  
312 temperature or overnight at 4°C. Embryos at E3.5 were fixed in 4% PFA for 30 min and in ice  
313 cold methanol for 15 min. After fixing, the embryos were washed with phosphate buffered  
314 saline (PBS; VWR), and then either used for whole-mount immunostaining or cryoprotected in  
315 30% sucrose overnight at 4°C. The embryos were transferred from 30% sucrose and  
316 embedded in optimum cutting temperature (OCT) compound (Sakura Finetek; Alphen an den  
317 Rijn, Netherlands) for cryosectioning.

318

319 Whole-mount immunofluorescence staining of intact mouse embryos was performed as  
320 previously described (Xiao *et al*, 2018). The embryos were then mounted in 1% low-melting  
321 agarose (Lonza; Basel, Switzerland) on a glass bottom dish (Thermo Fisher Scientific),  
322 covered in VectaShield mounting medium (Linaris; Dossenheim, Germany), and kept cold and  
323 protected from light until imaging. After imaging, the embryos were removed from the agarose,  
324 washed and digested for genotyping. Embryos at E3.5 were directly imaged in PBS in a glass  
325 bottom dish.

326

327 OCT-embedded embryos were cryosectioned at 8 µm thickness and the slides were fixed with  
328 ice-cold methanol for 10 min at -20°C, then washed two times with wash buffer containing  
329 0.2% Triton-X in PBS while shaking and blocked with wash buffer with 5% heat-inactivated  
330 goat serum for 1 h at room temperature. The slides were incubated with primary antibodies  
331 diluted in blocking solution overnight at 4°C. After washing two times with wash buffer, the  
332 slides were incubated with secondary antibodies and DAPI in blocking solution for 1 h at room  
333 temperature. After washing, the slides were mounted with coverslips using Prolong Gold (Cell  
334 Signaling Technology; Danvers, MA, USA).

335

336 For immunofluorescence of mESCs,  $2 \times 10^4$  cells were seeded per chamber onto pre-  
337 gelyatinized Lab-Tek II chamber slides (Thermo Fisher Scientific). After three days of culturing  
338 in corresponding media, the cells were washed with PBS, fixed with 4% PFA for 10 min at  
339 room temperature and washed three times with PBS. Next, the cells were fixed with ice-cold

340 methanol for 10 min at  $-20^{\circ}\text{C}$ , permeabilized with 0.5% Triton-X in PBS for 5 min at room  
341 temperature, and blocked with 5% heat-inactivated goat serum (Thermo Fisher Scientific) for  
342 at least 15 min at room temperature. The cells were incubated with primary antibodies diluted  
343 in blocking solution overnight at  $4^{\circ}\text{C}$ . After washing three times with wash buffer, the cells were  
344 incubated with secondary antibodies and DAPI diluted 1:1000 in blocking solution for 1 h at  
345 room temperature. After washing, the chamber was removed from the glass slide and  
346 coverslips were mounted using Prolong Gold anti-fade reagent (Cell Signaling Technology).  
347 The images were obtained using an SP8 confocal microscope (Leica Microsystems).

348

### 349 **Antibodies**

350 Primary antibodies used in this study and their dilutions and sources are listed in Table 3. The  
351 secondary antibodies used were Alexafluor® 488, 568, or 647 conjugates (Life Technologies)  
352 and diluted at 1:1000, in combination with DAPI (AppliChem) at 1:1000.

353

354 **Table 3.** List of primary antibodies used in this study.

| Antigen  | Host       | Dilution | Company           | Catalog Number |
|----------|------------|----------|-------------------|----------------|
| 53BP1    | Rabbit     | 1:1000   | Novus Biologicals | NB100-304      |
| CEP164   | Rabbit     | 1:2000   | Proteintech       | 22227-1-AP     |
| CI-CASP3 | Rabbit     | 1:400    | Cell Signaling    | 9661           |
| NANOG    | Rat        | 1:200    | Affymetrix        | 14-5761        |
| p53      | Rabbit     | 1:500    | Leica             | P53-CM5P-L     |
| pHH3     | rabbit     | 1:400    | Merck             | 06-570         |
| TUBG     | mouse IgG1 | 1:1000   | Sigma Aldrich     | T6557          |
| USP28    | rabbit     | 1:1000   | Sigma Aldrich     | HPA006778      |

355

### 356 **Image analyses**

357 Images of whole E6.5 or E7.5 embryos or mESCs stained with p53 or pHH3 and DAPI were  
358 quantified using ImageJ (NIH, Maryland, USA). A maximum projection image of mESCs or the  
359 middle five slices of the embryo were generated. The DAPI channel was used to set a threshold  
360 to obtain a region of interest. p53 and DAPI fluorescence intensities were measured, and the  
361 p53 intensity was normalized to the DAPI intensity. The average p53 intensity of controls was  
362 set to 1.0 and a fold-change p53 intensity was calculated. Centrosomes (defined as one TUBG  
363 focus or two close TUBG foci) and CEP164 foci were manually quantified using ImageJ (NIH).  
364 The number of nuclei were quantified using the image-based tool for counting nuclei (ITCN)  
365 ImageJ plug-in.

366

367

368 **Western Blotting**

369 mESCs were scraped in radioimmunoprecipitation assay (RIPA) buffer containing 150 mM  
370 NaCl, 50 mM Tris pH 7.6, 1% Triton X-100 (Sigma-Aldrich), 0.25% sodium deoxycholate, and  
371 0.1% sodium dodecyl sulfate (SDS; AppliChem; Darmstadt, Germany) with an  
372 ethylenediaminetetraacetic acid (EDTA)-free protease inhibitor cocktail (Merck), phosphatase  
373 inhibitor cocktail sets II (Merck) and IV (Merck), and phenylmethylsulfonyl fluoride (PMSF;  
374 Sigma-Aldrich). Protein concentration was measured with an RC DC protein assay kit (Bio-  
375 Rad; Feldkirchen, Germany). 10 µg protein per sample was loaded. SDS-polyacrylamide gel  
376 electrophoresis (PAGE) and immunoblotting were performed following standard procedures  
377 (Kurien and Scofield, 2006; Towbin et al., 1979). Following SDS-PAGE, the proteins were  
378 transferred to polyvinylidene fluoride (PVDF) membranes (Merck) that were activated in  
379 methanol (Carl Roth) for 1 min, blocked in 5% milk (Carl Roth) for 1 h, and incubated with an  
380 anti-p53 antibody (1:5000; Leica Biosystems; Buffalo Grove, IL, USA) or an anti-GAPDH  
381 antibody (1:10<sup>4</sup>; Merck) overnight at 4°C. The membranes were washed with Tris buffered  
382 saline containing Tween 20 (AppliChem; TBST) and incubated with secondary anti-rabbit (GE  
383 Healthcare; Chicago, IL, US) or anti-mouse (GE Healthcare) antibodies linked with horseradish  
384 peroxidase (HRP) at 1:10<sup>4</sup> for 1 h at room temperature. Finally, the membranes were washed  
385 with TBST and incubated with enhanced chemiluminescence (ECL; GE Healthcare; Chicago,  
386 IL, USA) and signals were detected with on film (GE Healthcare) in a dark room.

387

388 **Statistical Analyses**

389 Statistical analyses comparing two groups of data using a two-tailed Student's t-test with a  
390 cutoff for significance of less than 0.05 and graphic representations with standard deviations  
391 were performed using GraphPad Prism 7 (GraphPad Software, San Diego, CA, USA).

392 **Acknowledgements**

393 We thank the CECAD *in vivo* research facility for generating and maintaining our mouse lines  
394 and the CECAD imaging facility for microscopy support. The work was supported by the  
395 Deutsche Forschungsgemeinschaft (DFG, German Research Foundation) [BA 5810/1-1 to  
396 H.B]. The funders had no role in study design, data collection and analysis, decision to publish,  
397 or preparation of the manuscript.

398

399 **Author contributions**

400 Conceptualization: C.X. and H.B.; Methodology: C.X., M.G., C.G., M.M., R.F. and H.B.;  
401 Software: C.X., M.G., C.G.; Formal Analysis: C.X, M.G., C.G.; Investigation: C.X., M.G.,  
402 C.G., M.M., R.F. and H.B.; Writing: C.X. and H.B.; Visualization: C.X., M.G., C.G.;  
403 Supervision, Project administration and Funding Acquisition: H.B.

404

405 **Competing Conflict of interest**

406 No competing interests declared.

407 **References**  
408

- 409 Bangs FK, Schrode N, Hadjantonakis AK, Anderson KV (2015) Lineage specificity of primary  
410 cilia in the mouse embryo. *Nat Cell Biol* 17: 113-122
- 411 Basto R, Lau J, Vinogradova T, Gardiol A, Woods CG, Khodjakov A, Raff JW (2006) Flies  
412 without centrioles. *Cell* 125: 1375-1386
- 413 Bazzi H, Anderson KV (2014a) Acentriolar mitosis activates a p53-dependent apoptosis  
414 pathway in the mouse embryo. *Proc Natl Acad Sci U S A* 111: E1491-1500
- 415 Bazzi H, Anderson KV (2014b) Centrioles in the mouse: cilia and beyond. *Cell Cycle* 13:  
416 2809
- 417 Behringer R, Gertsenstein M, Vintersen Nagy K, Nagy A, 2014. Manipulating the Mouse  
418 Embryo: A Laboratory Manual, Fourth Edition, Cold Harbor Laboratory Press. pp. 198-  
419 200,268-271.
- 420 Bornens M (2012) The centrosome in cells and organisms. *Science* 335: 422-426
- 421 Bowling S, Di Gregorio A, Sancho M, Pozzi S, Aarts M, Signore M, M DS, Martinez-Barbera  
422 JP, Gil J, Rodriguez TA (2018) P53 and mTOR signalling determine fitness selection through  
423 cell competition during early mouse embryonic development. *Nat Commun* 9: 1763
- 424 Bryja V, Bonilla S, Arenas E (2006) Derivation of mouse embryonic stem cells. *Nat Protoc* 1:  
425 2082-2087
- 426 Chu VT, Weber T, Graf R, Sommermann T, Petsch K, Sack U, Volchkov P, Rajewsky K,  
427 Kuhn R (2016) Efficient generation of Rosa26 knock-in mice using CRISPR/Cas9 in C57BL/6  
428 zygotes. *BMC Biotechnol* 16: 4
- 429 Conduit PT, Wainman A, Raff JW (2015) Centrosome function and assembly in animal cells.  
430 *Nat Rev Mol Cell Biol* 16: 611-624
- 431 Courtois A, Hiiragi T (2012) Gradual meiosis-to-mitosis transition in the early mouse embryo.  
432 *Results and problems in cell differentiation* 55: 107-114
- 433 Courtois A, Schuh M, Ellenberg J, Hiiragi T (2012) The transition from meiotic to mitotic  
434 spindle assembly is gradual during early mammalian development. *J Cell Biol* 198: 357-370
- 435 Doench JG, Fusi N, Sullender M, Hegde M, Vaimberg EW, Donovan KF, Smith I, Tothova Z,  
436 Wilen C, Orchard R *et al* (2016) Optimized sgRNA design to maximize activity and minimize  
437 off-target effects of CRISPR-Cas9. *Nat Biotechnol* 34: 184-191
- 438 Fong CS, Mazo G, Das T, Goodman J, Kim M, O'Rourke BP, Izquierdo D, Tsou MF (2016)  
439 53BP1 and USP28 mediate p53-dependent cell cycle arrest in response to centrosome loss  
440 and prolonged mitosis. *Elife* 5
- 441 Graser S, Stierhof YD, Lavoie SB, Gassner OS, Lamla S, Le Clech M, Nigg EA (2007)  
442 Cep164, a novel centriole appendage protein required for primary cilium formation. *J Cell*  
443 *Biol* 179: 321-330
- 444 Gueth-Hallonet C, Antony C, Aghion J, Santa-Maria A, Lajoie-Mazenc I, Wright M, Maro B  
445 (1993) gamma-Tubulin is present in acentriolar MTOCs during early mouse development.  
446 *Journal of Cell Science* 105 ( Pt 1): 157-166
- 447 Haycraft CJ, Zhang Q, Song B, Jackson WS, Detloff PJ, Serra R, Yoder BK (2007)  
448 Intraflagellar transport is essential for endochondral bone formation. *Development* 134: 307-  
449 316
- 450 Howe K, FitzHarris G (2013) A non-canonical mode of microtubule organization operates  
451 throughout pre-implantation development in mouse. *Cell Cycle* 12: 1616-1624
- 452 Kirkham M, Müller-Reichert T, Oegema K, Grill S, Hyman AA (2003) SAS-4 is a *C. elegans*  
453 centriolar protein that controls centrosome size. *Cell* 112: 575-587
- 454 Kleylein-Sohn J, Westendorf J, Le Clech M, Habedanck R, Stierhof YD, Nigg EA (2007)  
455 Plk4-induced centriole biogenesis in human cells. *Dev Cell* 13: 190-202
- 456 Kong D, Farmer V, Shukla A, James J, Gruskin R, Kiriya S, Loncarek J (2014) Centriole  
457 maturation requires regulated Plk1 activity during two consecutive cell cycles. *J Cell Biol* 206:  
458 855-865
- 459 Lambrus BG, Daggubati V, Uetake Y, Scott PM, Clutario KM, Sluder G, Holland AJ (2016) A  
460 USP28-53BP1-p53-p21 signaling axis arrests growth after centrosome loss or prolonged  
461 mitosis. *J Cell Biol* 214: 143-153

462 Lambrus BG, Holland AJ (2017) A New Mode of Mitotic Surveillance. *Trends Cell Biol* 27:  
463 314-321  
464 Lambrus BG, Uetake Y, Clutario KM, Daggubati V, Snyder M, Sluder G, Holland AJ (2015)  
465 p53 protects against genome instability following centriole duplication failure. *J Cell Biol* 210:  
466 63-77  
467 Leidel S, Gonczy P (2003) SAS-4 is essential for centrosome duplication in *C. elegans* and is  
468 recruited to daughter centrioles once per cell cycle. *Dev Cell* 4: 431-439  
469 Loncarek J, Khodjakov A (2009) Ab ovo or de novo? Mechanisms of centriole duplication.  
470 *Mol Cells* 27: 135-142  
471 Manandhar G, Sutovsky P, Joshi HC, Stearns T, Schatten G (1998) Centrosome reduction  
472 during mouse spermiogenesis. *Dev Biol* 203: 424-434  
473 Martello G, Smith A (2014) The nature of embryonic stem cells. *Annu Rev Cell Dev Biol* 30:  
474 647-675  
475 Meitinger F, Anzola JV, Kaulich M, Richardson A, Stender JD, Benner C, Glass CK, Dowdy  
476 SF, Desai A, Shiao AK *et al* (2016) 53BP1 and USP28 mediate p53 activation and G1 arrest  
477 after centrosome loss or extended mitotic duration. *J Cell Biol* 214: 155-166  
478 Nichols J, Smith A (2011) The origin and identity of embryonic stem cells. *Development* 138:  
479 3-8  
480 Rosner MH, Vigano MA, Ozato K, Timmons PM, Poirier F, Rigby PW, Staudt LM (1990) A  
481 POU-domain transcription factor in early stem cells and germ cells of the mammalian  
482 embryo. *Nature* 345: 686-692  
483 Siller SS, Sharma H, Li S, Yang J, Zhang Y, Holtzman MJ, Winuthayanon W, Colognato H,  
484 Holdener BC, Li FQ *et al* (2017) Conditional knockout mice for the distal appendage protein  
485 CEP164 reveal its essential roles in airway multiciliated cell differentiation. *PLoS genetics* 13:  
486 e1007128  
487 Tang CJ, Fu RH, Wu KS, Hsu WB, Tang TK (2009) CPAP is a cell-cycle regulated protein  
488 that controls centriole length. *Nat Cell Biol* 11: 825-831  
489 Troder SE, Ebert LK, Butt L, Assenmacher S, Schermer B, Zevnik B (2018) An optimized  
490 electroporation approach for efficient CRISPR/Cas9 genome editing in murine zygotes. *PLoS*  
491 *One* 13: e0196891  
492 Williams RL, Hilton DJ, Pease S, Willson TA, Stewart CL, Gearing DP, Wagner EF, Metcalf  
493 D, Nicola NA, Gough NM (1988) Myeloid leukaemia inhibitory factor maintains the  
494 developmental potential of embryonic stem cells. *Nature* 336: 684-687  
495 Wong YL, Anzola JV, Davis RL, Yoon M, Motamedi A, Kroll A, Seo CP, Hsia JE, Kim SK,  
496 Mitchell JW *et al* (2015) Cell biology. Reversible centriole depletion with an inhibitor of Polo-  
497 like kinase 4. *Science* 348: 1155-1160  
498 Woolley DM, Fawcett DW (1973) The degeneration and disappearance of the centrioles  
499 during the development of the rat spermatozoon. *Anat Rec* 177: 289-301  
500 Xiao C, Nitsche F, Bazzi H (2018) Visualizing the Node and Notochordal Plate In  
501 Gastrulating Mouse Embryos Using Scanning Electron Microscopy and Whole Mount  
502 Immunofluorescence. *J Vis Exp*  
503 Ying QL, Wray J, Nichols J, Battle-Morera L, Doble B, Woodgett J, Cohen P, Smith A (2008)  
504 The ground state of embryonic stem cell self-renewal. *Nature* 453: 519-523  
505 Zhang G, Xie Y, Zhou Y, Xiang C, Chen L, Zhang C, Hou X, Chen J, Zong H, Liu G (2017)  
506 p53 pathway is involved in cell competition during mouse embryogenesis. *Proc Natl Acad Sci*  
507 *U S A* 114: 498-503  
508 Ziegler-Birling C, Helmrich A, Tora L, Torres-Padilla ME (2009) Distribution of p53 binding  
509 protein 1 (53BP1) and phosphorylated H2A.X during mouse preimplantation development in  
510 the absence of DNA damage. *Int J Dev Biol* 53: 1003-1011  
511



512 **Figure Legends**

513 **Fig. 1. The mitotic surveillance pathway is conserved in the mouse *in vivo*.**

514 (A) Gross morphology of WT, *Sas-4*<sup>-/-</sup>, *Sas-4*<sup>-/-</sup> *53bp1*<sup>-/-</sup>, and *Sas-4*<sup>-/-</sup> *Usp28*<sup>-/-</sup> embryos at  
515 E9.5. Scale bar = 500 μm.

516 (B, C) Immunostaining for p53 (B) and Cleaved-Caspase3 (Cl-CASP3, C) on transverse  
517 sections of WT, *Sas-4*<sup>-/-</sup>, *Sas-4*<sup>-/-</sup> *53bp1*<sup>-/-</sup>, and *Sas-4*<sup>-/-</sup> *Usp28*<sup>-/-</sup> embryos at E9.5. The area  
518 shown encompasses the ventral neural tube and surrounding mesenchyme. Asterisks in B  
519 denote non-specific staining of blood cells. Scale bar = 50 μm.

520

521 **Fig. 2. p53 upregulation in *Sas-4*<sup>-/-</sup> embryos is evident by E7.5 and is not due to the  
522 onset of 53BP1 or USP28 expression.**

523 (A) Whole-mount immunostaining for p53 on control (Ctrl) and *Sas-4*<sup>-/-</sup> embryos at E7.5 and  
524 E6.5. Representative sagittal planes are shown and the dotted lines demarcate the epiblast.  
525 Scale bars = 100 μm.

526 (B) Quantification of nuclear p53 fluorescence intensity in the epiblast, normalized to control  
527 embryos in the same batch at E7.5 (n = 4) and at E6.5 (n = 9). \*\*\* p < 0.001. Error bars  
528 represent mean ± s.d.

529 (C) Sagittal planes of whole-mount immunostaining for 53BP1 and USP28 on WT embryos at  
530 E5.5. Scale bar = 50 μm.

531 (B) Immunostaining for 53BP1 and USP28 on sagittal sections of WT embryos at E6.5. Scale  
532 bar = 50 μm.

533

534 **Fig. 3. *Sas-4*<sup>-/-</sup> mESCs activate the mitotic surveillance pathway.**

535 (A) Immunostaining for the centrosome marker γ-tubulin (TUBG) on WT and *Sas-4*<sup>-/-</sup> primary  
536 mESCs. The bottom panels are magnifications of the areas marked in the top panels. Scale  
537 bars = 20 μm (top) and 10 μm (bottom).

538 (B) Immunostaining for NANOG and p53 on WT and *Sas-4*<sup>-/-</sup> primary mESCs in pluripotent  
539 and partially differentiated conditions. Scale bars = 50 μm.

540 (C) Quantification of p53 fluorescence intensities shown in B normalized to WT (n = 4). \*\* p <  
541 0.01, \* p < 0.05. Error bars represent mean ± s.d.

542 (D) Three-day growth curves of WT, *Sas-4*<sup>-/-</sup>, *p53*<sup>-/-</sup>, and *Sas-4*<sup>-/-</sup> *p53*<sup>-/-</sup> primary mESCs in  
543 the indicated conditions starting with 10<sup>5</sup> cells on Day 0 (n = 4 for each). \*\* p < 0.01, \* p < 0.05.  
544 Error bars represent mean ± s.d.

545

546 **Fig. 4. Changes in the mitotic index in developing *Sas-4*<sup>-/-</sup> embryos correlate with  
547 centriole maturation.**

548 (A, B) The mitotic index, or percentage of pHH3-positive cells, of control and *Sas-4*<sup>-/-</sup> embryos

549 at E6.5 (n = 8) and E7.5 (n = 6) (B) and mESCs (n = 4) in different culture conditions (C). The  
550 graph at E7.5 represents our previously published data (Bazzi and Anderson, 2014). \*\* p <  
551 0.01. Error bars represent mean  $\pm$  s.d.

552 (C) Sagittal planes of immunostaining for TUBG and CEP164 on WT mouse embryos from  
553 E3.5 to E6.5. The bottom panels are magnifications of the areas marked in the top panels.  
554 Scale bars = 20  $\mu$ m (top) and 3  $\mu$ m (bottom).

555 (D) Quantification of the percentage of epiblast cells with centrosomes (TUBG) and the  
556 percentage of centrosomes with CEP164. \*\*\*\* p < 0.0001. Error bars represent mean  $\pm$  s.d.

557

558 **Fig. 5. A schematic model of the correlation between gradual centriole maturation and**  
559 **centrosome functions during mouse embryonic development.**

560 Centrioles first form by *de novo* biogenesis around E3 and gradually mature to provide a  
561 template for cilia and MTOCs for mitosis around E7, when the mitotic surveillance pathway is  
562 established.

563 **Expanded View Figure Legends**

564 **Fig. EV1. *53bp1*<sup>-/-</sup> and *Usp28*<sup>-/-</sup> are null alleles.**

565 (A, B) Immunostaining for 53BP1 (A) or USP28 (B) on sagittal sections of control (Ctrl) and  
566 *Sas-4*<sup>-/-</sup> *53bp1*<sup>-/-</sup> (A) or *Usp28*<sup>-/-</sup> (B) embryos at E8.5. The signals for the corresponding  
567 proteins are not detectable in the mutants compared to controls. The V-shaped neural plate,  
568 underlying mesenchyme and gut tube are shown. Scale bars = 50 μm.

569

570 **Fig. EV2. *Ift88*<sup>-/-</sup> cilia mutants do not upregulate p53, and both 53BP1 and USP28 are**  
571 **expressed in *Sas-4*<sup>-/-</sup> embryos at E6.5.**

572 (A) Immunostaining for p53 on whole-mount Ctrl and *Ift88*<sup>-/-</sup> embryos at E7.5 and E6.5. Mid-  
573 sagittal planes are shown with the dotted lines demarcating the epiblast. Scale bars = 100 μm.

574 (B) Quantification of p53 nuclear fluorescence intensity in the epiblast normalized to Ctrl  
575 embryos in the same batch at E7.5 (n = 3) and E6.5 (n = 4). Error bars represent mean ± s.d.

576 (C) Immunostaining for 53BP1 and USP28 on transverse sections of *Sas-4*<sup>-/-</sup> embryos at E6.5.  
577 Scale bar = 50 μm.

578

579 **Fig. EV3. *p53*<sup>-/-</sup> and *Sas-4*<sup>-/-</sup> *p53*<sup>-/-</sup> primary mESCs are null alleles for p53.**

580 Western blot analysis for p53 and GAPDH loading control on WT, *Sas-4*<sup>-/-</sup>, *p53*<sup>-/-</sup>, and *Sas-4*<sup>-/-</sup>  
581 *p53*<sup>-/-</sup> mESC lysates. The numbers below *p53*<sup>-/-</sup> and *Sas-4*<sup>-/-</sup> *p53*<sup>-/-</sup> indicate the number of  
582 base pairs deleted.

**Fig. 1****A**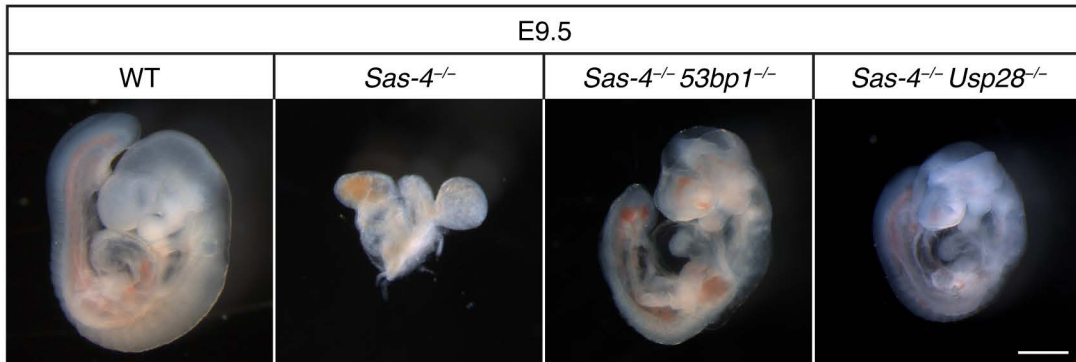**B**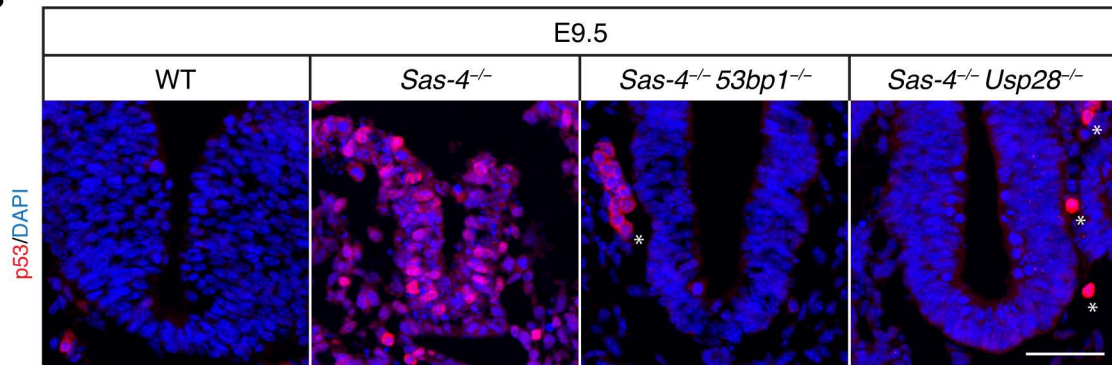**C**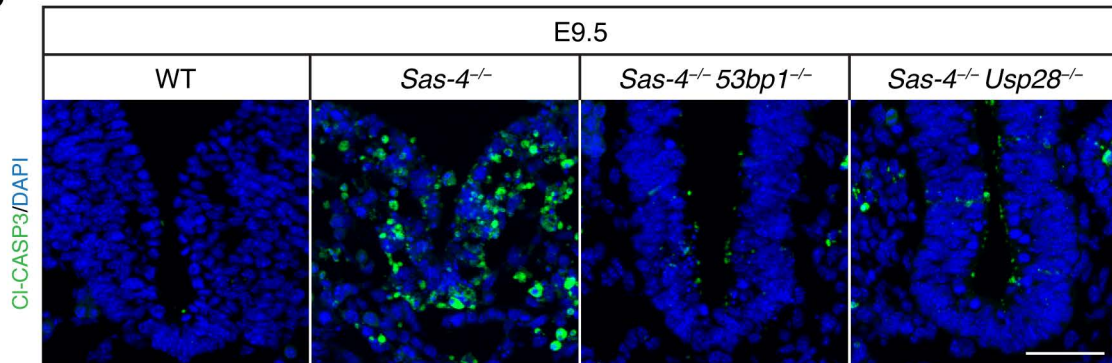

**Fig. 2****A**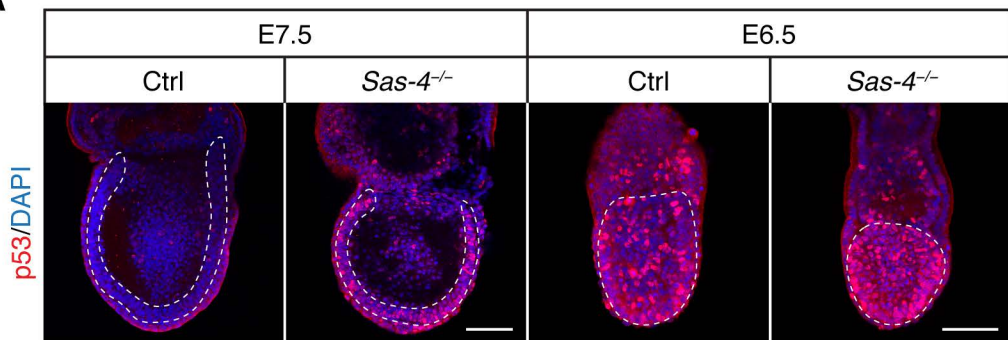**B**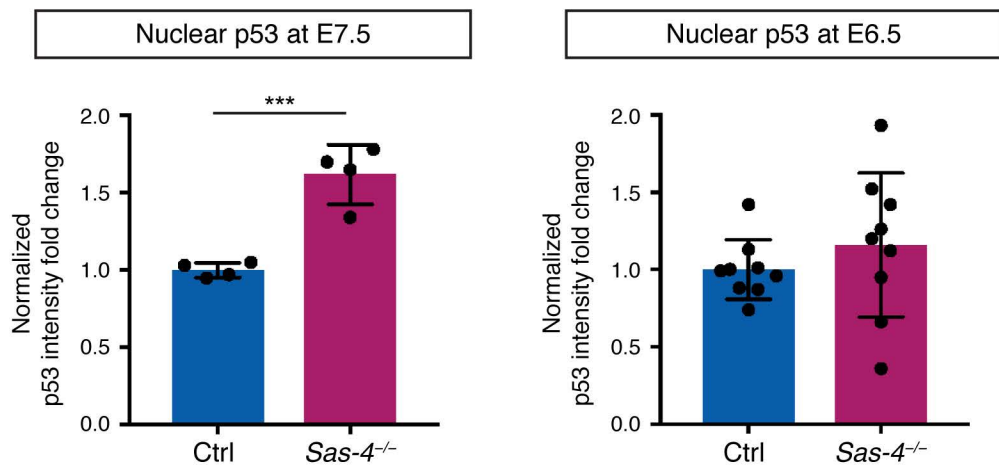**C**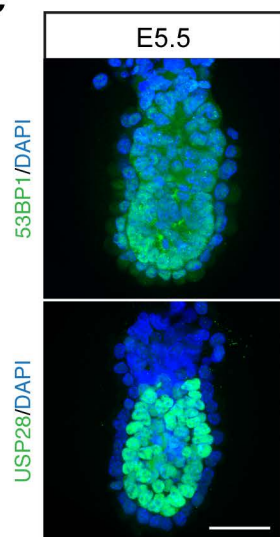**D**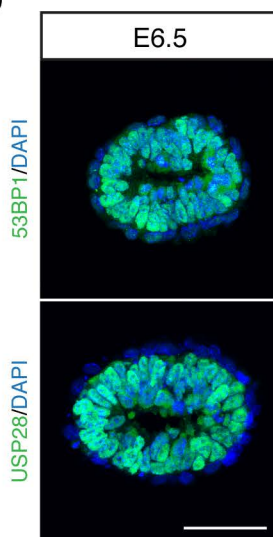

**Fig. 3****A**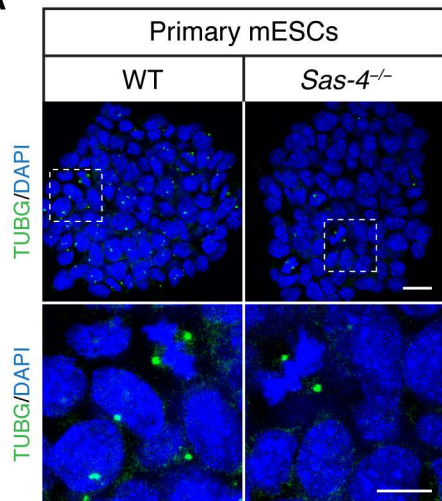**B**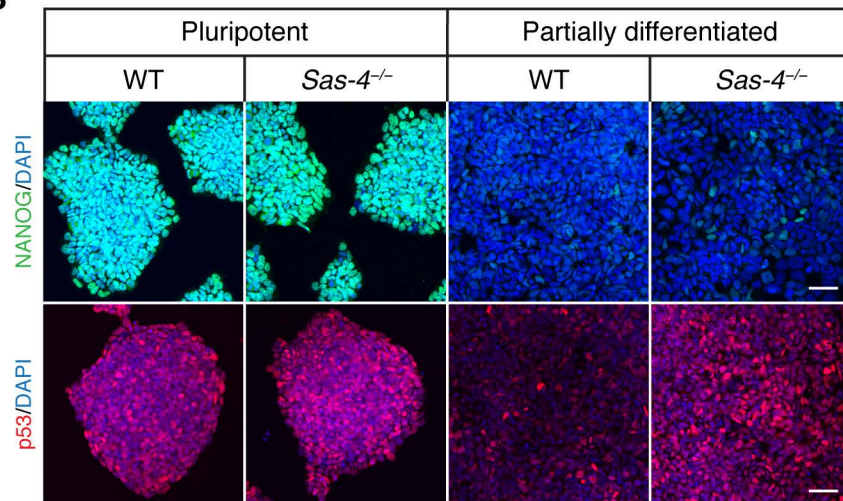**C**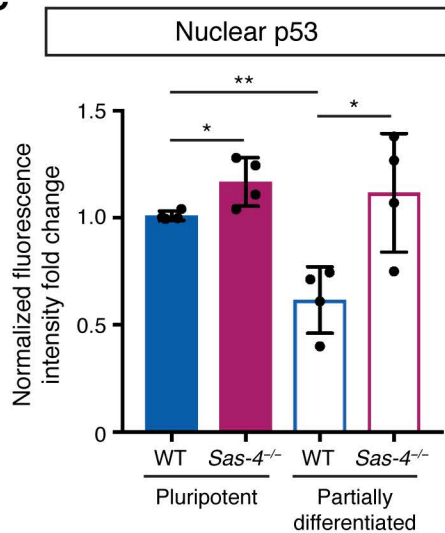**D**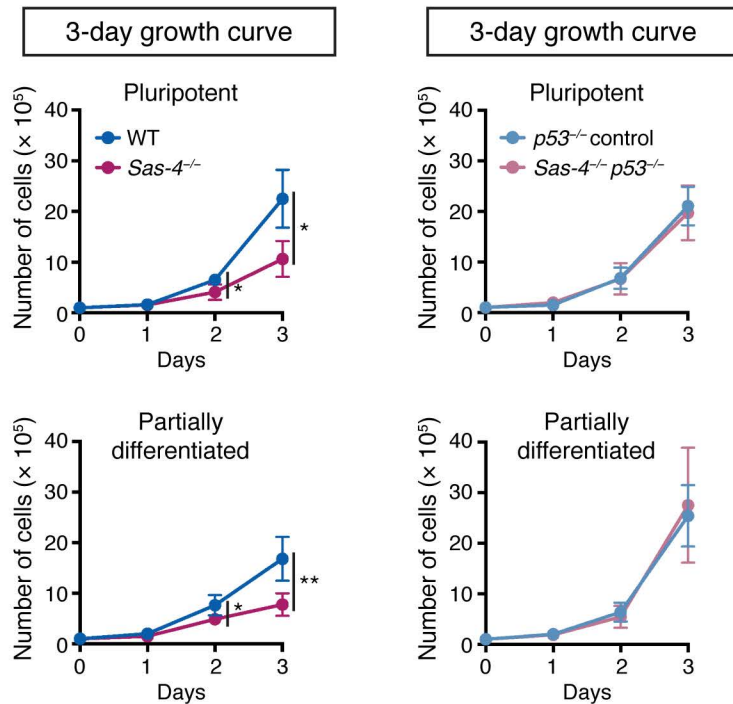

**Fig. 4****A**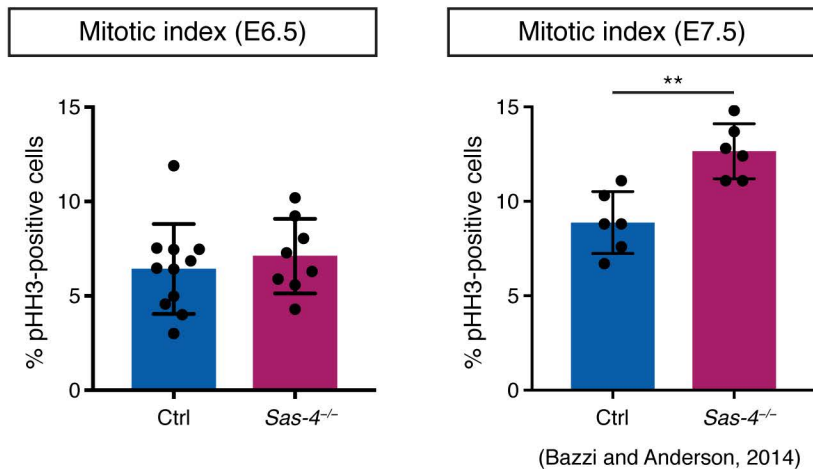**B**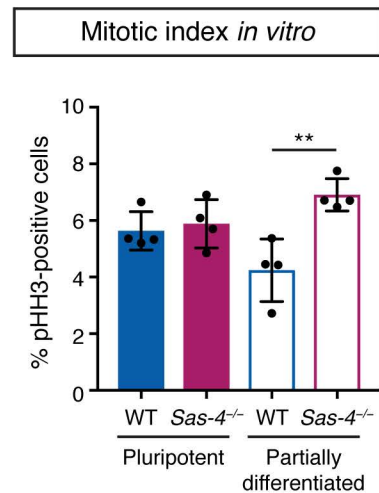**C**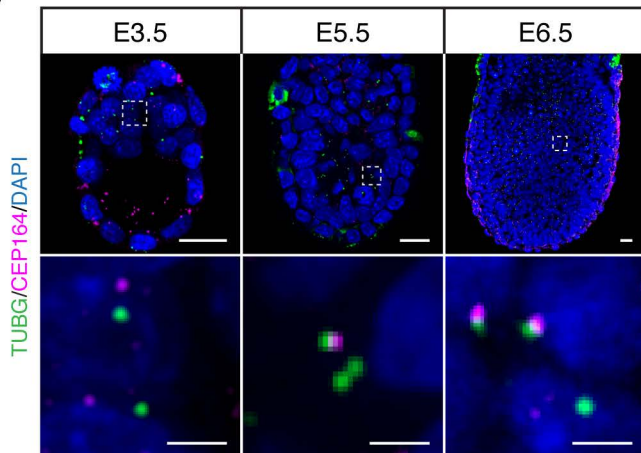**D**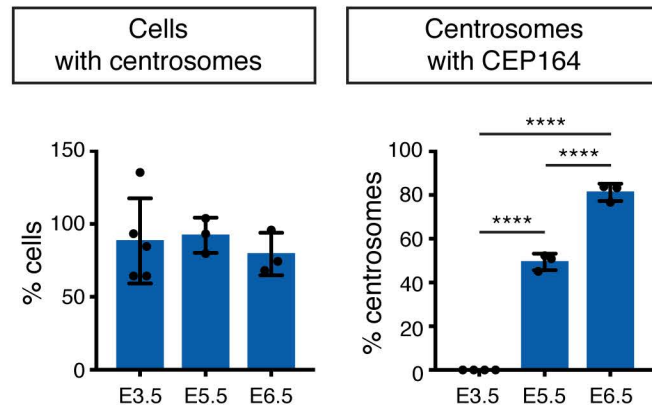

**Fig. 5**

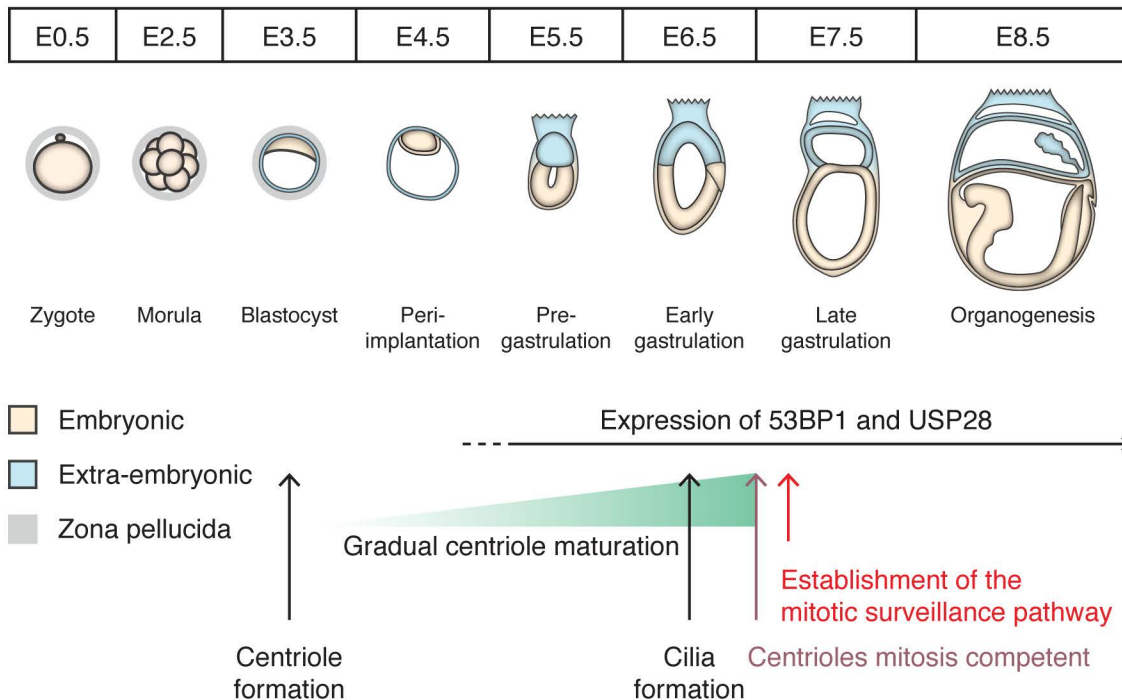



**Fig. EV1**

**A**

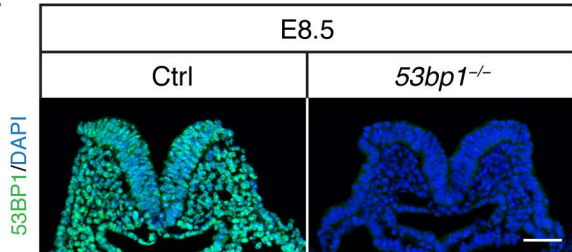

**B**

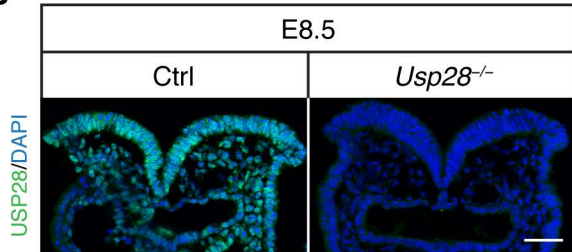

**Fig. EV2**

**A**

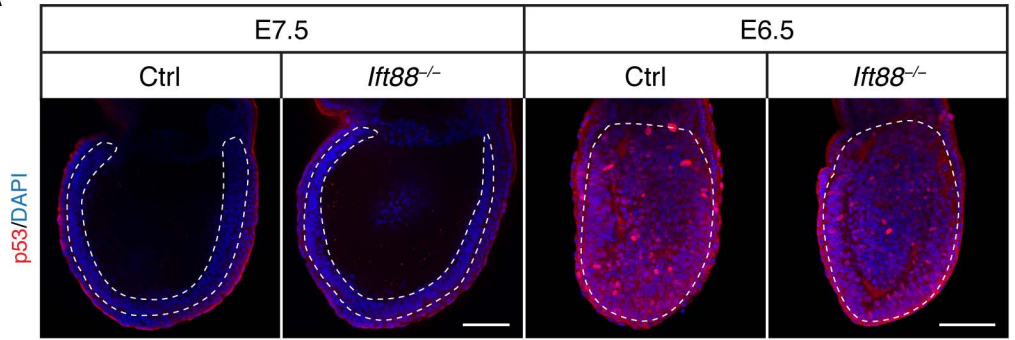

**B**

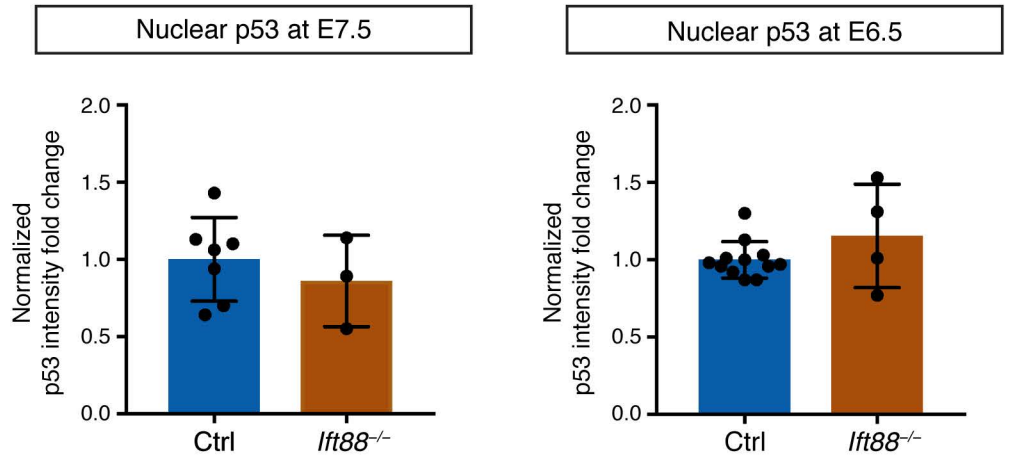

**C**

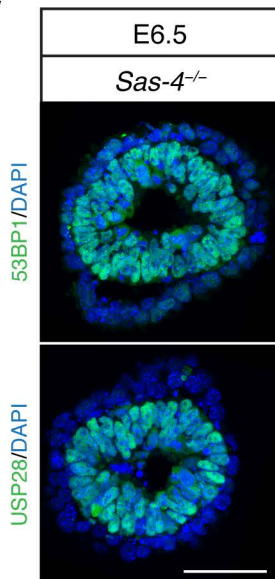

**Fig. EV3**

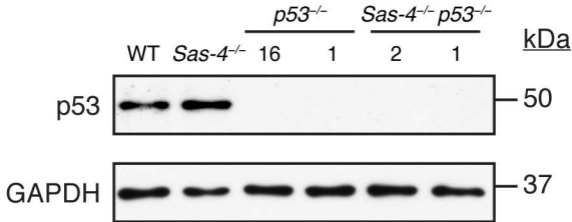

Source: https://www.biorxiv.org/content/10.1101/2020.07.24.219402v1.full.pdf
